# Supplementary figures and images for: The temporal representation of experience in subjective mood
Source: eLife journal article supplement (doi:10.7554/elife.62051), 2021-06-14

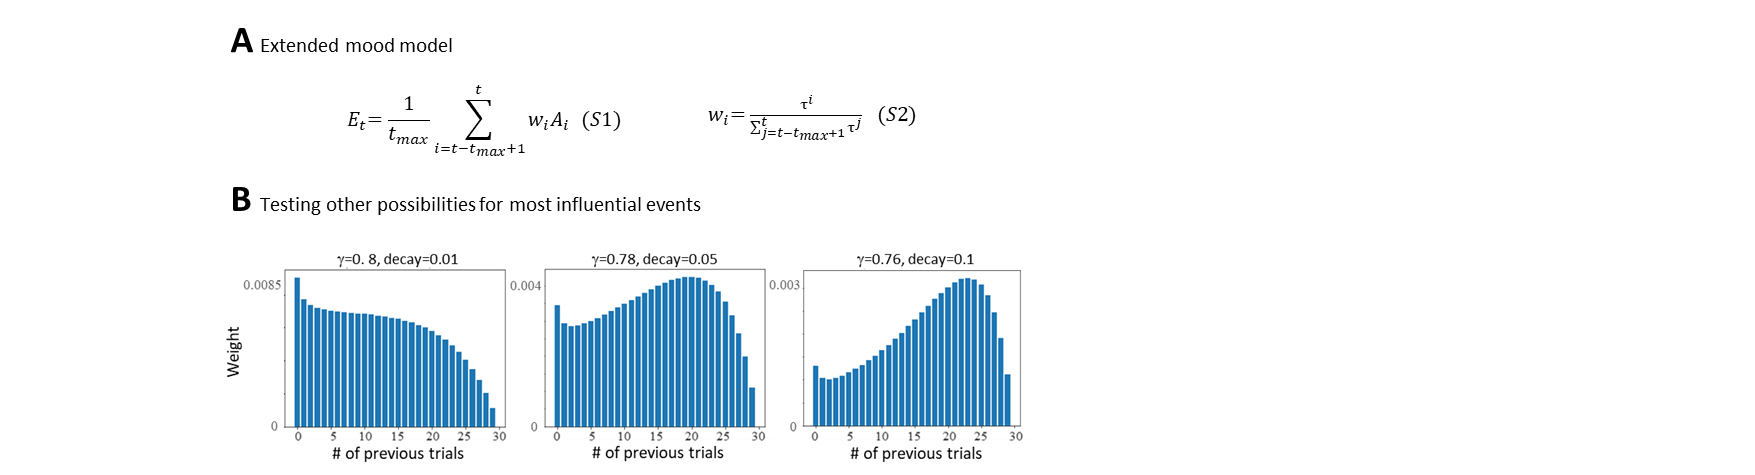

Supplement: supp [file elife_poa_e62051_Figure_3_figure_supplement_2.docx]
